1 **Two point mutations in the Hantaan virus glycoproteins afford the generation of a highly**  
2 **infectious recombinant vesicular stomatitis virus vector**

3

4 Megan M. Slough, Kartik Chandran\*, Rohit K. Jangra\*

5

6 **Affiliations**

7 Department of Microbiology and Immunology, Albert Einstein College of Medicine, Bronx, NY  
8 10461, USA.

9

10

11 Running title: Recombinant VSV bearing Hantaan virus glycoproteins

12

13

14 Word counts:

15 Abstract: 250 words

16 Article: 4,359 words

17

18

19

20 \*Corresponding authors.

21 Email: [kartik.chandran@einstein.yu.edu](mailto:kartik.chandran@einstein.yu.edu) (K.C.); [rohit.jangra@einstein.yu.edu](mailto:rohit.jangra@einstein.yu.edu) (R.K.J.)

22

23

24  
25  
26  
27  
28  
29  
30  
31  
32  
33  
34  
35  
36  
37  
38  
39  
40  
41  
42  
43  
44  
45

## Abstract

Rodent-to-human transmission of hantaviruses is associated with severe disease. Currently, no FDA-approved, specific antivirals or vaccines are available, and the requirement for high biocontainment (BSL3) laboratories limits hantavirus research. To study hantavirus entry in a BSL-2 laboratory, we set out to generate replication-competent, recombinant vesicular stomatitis viruses (rVSVs) bearing the Gn/Gc entry glycoproteins. As previously reported, rVSVs bearing New World hantavirus Gn/Gc were readily rescued from cDNAs, but their counterparts bearing Gn/Gc from the Old World hantavirus, Hantaan virus (HTNV), were refractory to rescue and only grew to low titers. However, serial passage of the rescued rVSV-HTNV Gn/Gc virus markedly increased its infectivity and capacity for cell-to-cell spread. This gain in viral fitness was associated with the acquisition of two point mutations; I532K in the cytoplasmic tail of Gn, and S1094L in the membrane-proximal stem of Gc. Follow-up experiments with rVSVs and single-cycle VSV pseudotypes confirmed these results. Mechanistic studies revealed that both mutations were determinative and contributed to viral infectivity in a synergistic manner. Our findings indicate that the primary mode of action of these mutations is to relocalize HTNV Gn/Gc from the Golgi complex to the cell surface, thereby affording significantly enhanced Gn/Gc incorporation into budding VSV particles. Our results suggest that enhancements in cell-surface expression of hantaviral glycoprotein(s) through incorporation of cognate mutations could afford the generation of rVSVs that are otherwise challenging to rescue. The robust replication-competent rVSV-HTNV Gn/Gc reported herein may also have utility as a vaccine.

46

## Importance

47           Human hantavirus infections cause pulmonary syndrome in the Americas and  
48 hemorrhagic fever with renal syndrome (HFRS) in Eurasia. No FDA-approved vaccines and  
49 therapeutics exist for these deadly viruses, and their development is limited by the requirement  
50 for high biocontainment. In this study, we identified and characterized key amino acid changes in  
51 the surface glycoproteins of HFRS-causing Hantaan virus that enhance their incorporation into  
52 recombinant vesicular stomatitis virus (rVSV) particles. The replication-competent rVSV  
53 genetically encoding Hantaan virus glycoproteins described in this work provides a powerful and  
54 facile system to study hantavirus entry under lower biocontainment and may have utility as a  
55 hantavirus vaccine.

56

## Introduction

57        Rodent-borne hantaviruses (family *Hantaviridae* of segmented negative-strand RNA  
58 viruses) cause hemorrhagic fever with renal syndrome (HFRS) in Eurasia and hantavirus  
59 pulmonary syndrome (HPS) in the Americas (1). Globally, more than 150,000 cases of  
60 hantavirus disease occur per year. Human population growth, accelerating climate change, and  
61 habitat loss are predicted to increase the size and severity of hantavirus disease outbreaks (2–6).  
62 Although inactivated viral vaccines are in use in Asia for HFRS-causing Seoul (SEOV) and  
63 Hantaan (HTNV) viruses, their protective efficacy is moderate at best (7–9), and no FDA-  
64 approved hantavirus vaccines or antivirals are available. The development of hantavirus  
65 countermeasures is hampered by our limited understanding of the molecular mechanisms of viral  
66 replication and disease pathogenesis, the lack of tools available to investigate these mechanisms,  
67 and the need to perform hantavirus research under high biocontainment.

68        The development of surrogate viral systems (10, 11) that recapitulate cell entry and  
69 infection under BSL-2 containment (or lower) has greatly accelerated both basic mechanistic  
70 investigations of virulent emerging viruses and the discovery and development of vaccines and  
71 therapeutics to target them (12–15). Several such systems have been described for hantaviruses,  
72 whose glycoproteins Gn and Gc (hereafter, Gn/Gc) are necessary and sufficient for viral entry  
73 (16). When expressed in cells with or without the nucleoprotein N, Gn/Gc were shown to self-  
74 assemble to produce virus-like particles (VLPs) with utility for studies of viral glycoprotein  
75 maturation and assembly (17–19) and as potential vaccine vectors (18). Single-cycle  
76 gammaretroviral and lentiviral vectors bearing HTNV or ANDV Gn/Gc have been employed for  
77 viral entry and antibody neutralization studies, and as candidate vectors for vaccination and gene  
78 therapy (20–24). Consistent with the flexibility of heterologous protein incorporation in the

79 budding virions of vesicular stomatitis virus (VSV), multiple groups have also developed VSV-  
80 based single-cycle pseudovirions for both HFRS-causing hantaviruses [HTNV (16, 25–27),  
81 Puumala virus (PUUV) (26, 28) and SEOV (16)] and HPS-causing hantaviruses [ANDV (29)  
82 and Sin Nombre virus (SNV) (27)].

83 Although single-cycle pseudovirions have advanced our understanding of hantavirus  
84 Gn/Gc assembly, viral entry, and antiviral immune responses, they are labor-intensive to  
85 generate in high yield. By contrast, self-replicating, recombinant VSVs (hereafter, rVSVs),  
86 whose genomes have been modified to carry the hantavirus M gene (encoding Gn/Gc) in place of  
87 the VSV glycoprotein (G) gene, are relatively easy to produce in quantity, readily amenable to  
88 forward-genetic and small-molecule screens, and are unique among surrogate systems in  
89 affording forward-genetic selections to identify escape mutants against neutralizing antibodies  
90 and small-molecule entry inhibitors (30–33). Brown *et al.* (34), were the first to generate a rVSV  
91 bearing ANDV Gn/Gc and showed that it could protect Syrian hamsters against lethal ANDV  
92 challenge when administered as a vaccine (34, 35). Similar viruses have been used to identify  
93 host factors required for ANDV entry (27, 36). To expand the pool of such rVSVs for hantavirus  
94 research, we previously rescued a rVSV bearing SNV Gn/Gc from cDNA (36). However, rVSVs  
95 bearing Gn/Gc from the HFRS-causing Hantaan virus (HTNV) proved challenging to rescue and  
96 yielded only a slowly replicating virus.

97 Here, we show that serial passage of the initial rVSV-HTNV Gn/Gc stock in cell culture  
98 afforded the generation of a variant with enhanced replicative fitness suitable for viral entry  
99 studies. We mapped this gain in viral fitness to the acquisition of two point mutations: I532K in  
100 the cytoplasmic tail of Gn, and S1094L in the stem region of Gc. Mechanistic studies revealed  
101 that these mutations enhance rVSV infectivity by relocalizing HTNV Gn/Gc from the Golgi

102 complex to the cell surface, thereby augmenting Gn/Gc incorporation into budding VSV  
103 particles. Our results suggest that selection- and protein engineering-based approaches to boost  
104 the cell surface expression of entry glycoproteins from other hantaviruses, or even more  
105 divergent bunyaviruses, could enable the generation of rVSVs that are otherwise refractory to  
106 rescue and/or replicate only poorly. The rVSV-HTNV Gn/Gc vector described herein may have  
107 utility as an HTNV vaccine.

108

## Results

### 109 **Two point mutations in the Gn/Gc complex enhance spread and replication of rVSV-** 110 **HTNV Gn/Gc.**

111 Hantaviruses are classified as biosafety level-3 (BSL-3) agents. To study hantavirus entry  
112 and infection in a BSL-2 setting, we attempted to generate a replication-competent, recombinant  
113 vesicular stomatitis virus (rVSV) expressing the Gn/Gc glycoproteins of Hantaan virus (HTNV),  
114 a prototypic HFRS-causing hantavirus. Multiplication and spread of the early-passage rVSV  
115 bearing HTNV Gn/Gc was poor but improved dramatically following three serial passages in  
116 Vero cells. Analysis of the selected viral population identified two amino acid changes in Gn/Gc,  
117 one located in the cytoplasmic tail of Gn (I532K) and the other in the membrane-proximal stem  
118 of the Gc ectodomain (S1094L) (**Fig. 1A**). To determine if either or both mutations could  
119 account for enhanced viral multiplication, we attempted to rescue rVSV-HTNV Gn/Gc viruses  
120 from cDNAs incorporating each mutation separately and together. We successfully recovered  
121 both single- and double-mutant viruses, but not the rVSV bearing WT HTNV Gn/Gc. Growth  
122 curves revealed that the Gn/Gc double-mutant virus (I532K/S1094L) multiplied and spread more  
123 rapidly than either single-mutant virus (**Fig. 1B and C**).

124 To confirm the determinative role of each Gn/Gc mutation and exclude potentially  
125 confounding effects from mutations elsewhere in the viral genome, we generated and analyzed  
126 single-cycle VSV pseudotypes (pVSVs) bearing WT and mutant Gn/Gc proteins. Consistent with  
127 our findings with the rVSVs, pVSVs bearing the HTNV Gn/Gc (I532K/S1094L) double-mutant  
128 displayed a higher specific (per-particle) infectivity in Vero cells than those bearing either  
129 single-mutant or WT Gn/Gc (**Fig. 1D**), after normalization of each viral preparation for particle  
130 number (**Fig. 1E**). Further, each single-mutant was more infectious than WT. Together, these

131 findings indicate that mutations I532K and S1094 in HTNV Gn and Gc, respectively, make  
132 individual contributions to VSV-HTNV Gn/Gc infection, but confer a synergistic enhancement  
133 in infectivity when present in the same viral particles.

134

### 135 **The I532K/S1094L double mutation modestly enhances Gn/Gc production.**

136 To uncover the mechanism by which the mutations I532K and S1094L enhance VSV-  
137 HTNV Gn/Gc infectivity, we first examined the effects of these mutations on Gn/Gc expression.  
138 We transfected 293T cells with plasmids encoding WT or mutant Gn/Gc and used a cell-based  
139 ELISA to determine the relative Gn/Gc levels (see **Materials and Methods** for details). Cells  
140 were permeabilized to render Gn/Gc in all subcellular compartments accessible to  
141 immunodetection by the conformation-sensitive, HTNV Gc-specific monoclonal antibody 3G1  
142 (37). At 48 h post-transfection, the I532K/S1094L double mutation modestly elevated Gn/Gc  
143 expression in comparison to WT, although I532K had little or no effect, and S1094L modestly  
144 depressed Gn/Gc expression (**Fig. 2**). However, none of these changes from WT were  
145 statistically significant. These findings suggest that an increase in the steady state levels of  
146 Gn/Gc is not the primary mechanism by which the I532K/S1094L mutations enhance rVSV-  
147 HTNV Gn/Gc infectivity.

148

### 149 **The I532K/S1094L mutations together enhance localization of Gn/Gc at the plasma** 150 **membrane.**

151 Both VSV and HTNV acquire their surface glycoproteins in the secretory pathway during  
152 viral budding; however, they do so in distinct cellular compartments. Specifically, VSV particles  
153 bud at the plasma membrane, whereas HTNV particles, like those of many hantaviruses and



154 other bunyaviruses, are reported to bud into the Golgi apparatus. In keeping with these  
155 observations, VSV G and HTNV Gn/Gc (**Figs 3-4**) localize primarily to the plasma membrane  
156 and endoplasmic reticulum (ER)/Golgi apparatus, respectively (38–40). We postulated that this  
157 mismatch in the subcellular sites of viral budding and glycoprotein localization may account for  
158 the poor growth of rVSV-HTNV Gn/Gc, and that the I532K/S1094L mutations might ameliorate  
159 this mismatch. Accordingly, we examined the subcellular distribution of WT and mutant Gn and  
160 Gc in transfected U2OS cells by immunofluorescence (IF) microscopy. Gn and Gc colocalization  
161 was essentially complete for all variants (**Fig. 3**), showing that the mutations do not alter relative  
162 Gn and Gc distribution in cells. We further noted a predominantly perinuclear Gn/Gc staining for  
163 all variants that colocalized with GM130, a marker for the Golgi apparatus (**Fig. 4**), indicating  
164 that the mutants substantially retain Golgi localization. Interestingly, however, some cells  
165 expressing the double mutant also displayed marked Gn/Gc staining in the cell periphery (yellow  
166 arrows in **Figs. 3 and 4**), suggesting that a subset of these molecules do localize to the plasma  
167 membrane.

168 To directly examine this possibility, we immunostained U2OS cells transfected with  
169 plasmids expressing WT or mutant Gn/Gc to visualize the cell surface expression of these  
170 glycoproteins. The Gn mutation alone enhanced the cell-surface expression of both Gn and Gc,  
171 whereas the Gc mutation alone had little or no effect. Interestingly, the double-mutant afforded  
172 an even higher level of cell-surface Gn/Gc expression, indicating that the Gc mutation can act in  
173 concert with its Gn counterpart to drive relocalization of Gn/Gc to the plasma membrane (**Fig.**  
174 **5A**). Similar results were obtained with primary human umbilical vein endothelial cells  
175 (HUVEC) transfected with HTNV Gn/Gc expression plasmids (**Fig. 5B**). Quantitation of cell-  
176 surface Gc expression in plasmid-transfected U2OS cells by flow cytometry (**Fig. 5C**), and 293T

177 cells by on-cell ELISA (**Fig. 5D**), further corroborated the synergistic enhancement of Gn/Gc  
178 cell-surface expression conferred by the I532K and S1094L mutations.

179

180 **HTNV-Gn/Gc mutations collectively increase viral glycoprotein incorporation into VSV**  
181 **virions.**

182 Because VSV virions are known to acquire heterologous membrane proteins during viral  
183 budding at the host-cell plasma membrane, we reasoned that enhanced cell-surface-expression of  
184 mutant HTNV Gn/Gc might increase incorporation of the latter into VSV particles. To test this  
185 hypothesis, we examined single-cycle VSV pseudotypes (pVSVs) bearing WT and mutant  
186 Gn/Gc proteins for HTNV Gn/Gc incorporation by HTNV Gc-specific ELISA, after normalizing  
187 viral particle content by VSV matrix protein M-specific immunoblotting (**Fig. 6A**). Concordant  
188 with their effects on the cell-surface expression level of each glycoprotein, the Gn mutation  
189 alone enhanced incorporation of Gn/Gc into viral particles, whereas the Gc mutation did not, and  
190 combination of both mutations afforded a further synergistic increase in Gn/Gc incorporation  
191 (**Fig. 6B**). Taken together, these findings strongly suggest that relocalization of HTNV Gn/Gc  
192 from the Golgi complex to the plasma membrane induced by the I532K/S1094L mutations  
193 enhances rVSV-HTNV Gn/Gc infectivity by increasing viral glycoprotein incorporation into  
194 virus particles.

195

## Discussion

196

197

198

199

200

201

202

203

204

205

206

Retroviral and vesiculoviral pseudotypes carrying heterologous viral glycoproteins have greatly enhanced our understanding of viral glycoprotein maturation and virus assembly (20, 21), helped delineate roles of host factors in viral entry and other virus-host interactions (36, 41–43), assisted decipher mechanisms of immune response and correlates of protection (34, 44), and have successfully been used to isolate and characterize neutralizing antibodies (31, 45) and developed as vaccines (15, 34). Notwithstanding the remarkable ability of these virions to package heterologous glycoproteins that localize to the plasma membrane, not all viral entry glycoproteins are amenable to efficient pseudotyped virus production. Here, we combined the remarkable ability of rVSV to undergo mutations, akin to other RNA viruses, with forward genetic analyses to identify and characterize the role of two point mutations, one each in the HTNV Gn (I532K) and Gc (S1094L), that greatly enhance infectivity.

207

208

209

210

211

212

213

214

215

216

217

Like most members of the order *Bunyvirales*, HFRS-causing HTNV has been shown to bud at the Golgi cisternae (46, 47), with undetectable (48) or very low (16, 48, 49) amounts of Gn/Gc observed at the surface of cells expressing HTNV or another Old World hantavirus SEOV Gn/Gc. We hypothesized that I532K/S1094L mutations facilitate rVSV rescue by altering Gn/Gc expression and/or localization. Both of these mutations alone or together did not significantly affect total protein production (**Fig. 2**) or colocalization of Gn and Gc (**Fig. 3**). Although the majority of the single or double mutant Gn/Gc proteins were still localized to the Golgi complex (**Fig. 3**), as were the WT proteins, the Gn mutation alone (I532K) or together with the Gc mutation (I532K/S1094L) showed significantly elevated cell-surface expression as seen by immunofluorescence (**Figs. 3-4, 5A-B**), flow cytometry (**Fig. 5C**) and on-cell ELISA (**Fig. 5C**). As observed previously (16, 49), we also see some WT HTNV Gn/Gc protein expression on the

218 cell surface (**Figs. 3-5**). However, the I532K/S1094L mutations consistently enhanced cell  
219 surface expression, by 3- to 4-fold as compared to the WT, in multiple human cell lines (U2OS  
220 and 293T), as well as primary cells (HUVECs), at multiple times post-transfection, suggesting  
221 that this phenotype is not limited to a particular cell type or time point (**Figs. 3-5**). Importantly,  
222 enriched cell-surface expression correlated well with the levels of HTNV Gn/Gc incorporated in  
223 the vesiculoviral pseudovirions (**Fig. 6**), strongly indicating that relocalization of Gn/Gc from  
224 Golgi complex to the cell surface is the major mechanism by which these mutations enhance  
225 rVSV-HTNV Gn/Gc infectivity. Moreover, the rVSV-HTNV Gn/Gc resembled the authentic  
226 HTNV (36) with respect to dependence on the sterol regulatory element-binding protein  
227 (SREBP) pathway and cholesterol requirements for entry and infection (27, 36) underscoring its  
228 utility for studying hantavirus entry.

229         Some bunyaviral glycoproteins, including those of hantaviruses, are expressed on the cell  
230 surface of virus-infected as well as glycoprotein cDNA-transfected cells (50–54). Consistent  
231 with the localization of readily detectable Gn/Gc on the cell surface of HPS-causing viruses (53,  
232 55), transmission electron microscopic studies show evidence of plasma-membrane assembly of  
233 some New World hantaviruses such as SNV and Black Creek Canal virus (BCCV) (55, 56).  
234 Moreover, ANDV or SNV Gn and Gc can replace each other without affecting their normal  
235 trafficking (57). Interestingly, Gn of the HTNV, SEOV & another HRFS-causing Dobrava-  
236 Belgrade virus (DOBV) carries isoleucine at position 532 (PUUV is an exception), but it is a  
237 valine in that of the New World hantaviruses (**Fig. 7**). Congruent with these differences in  
238 cellular localization of their glycoproteins and virion budding sites, rescue of replication- and  
239 propagation-competent rVSVs carrying Gn/Gc from ANDV (34, 36) or SNV (36) was relatively  
240 easier than those carrying HTNV Gn/Gc.

241           How does the I532K mutation enhance cell surface expression of HTNV Gn/Gc? I532 is  
242 located in the region that has been shown to bind hantavirus nucleoprotein and RNA (58, 59),  
243 just upstream of the dual zinc finger domains in the cytoplasmic tail of the Gn (Gn-CT) protein  
244 (**Fig. 7**). Although Golgi retention of many bunyaviruses is mediated by Gn alone (60–65),  
245 signals in both hantavirus Gn and Gc seem to contribute to their Golgi localization. Gn proteins  
246 of HTNV (39), ANDV or SNV (53, 57) are retained in the ER when expressed alone and need  
247 co-expression of Gc for their Golgi transport. On the contrary, Pensiero & Hay (40) reported that  
248 HTNV Gn alone can localize to Golgi and the Golgi retention signal is likely located in the N-  
249 terminal 20 amino acids of the Gn-CT. The corresponding region of Gc from an orthobunyavirus  
250 Uukuniemi virus (UUKV), has also been suggested to be the Golgi retention signal for UUKV  
251 Gn/Gc (52). We hypothesize that the I532K mutation relocalizes HTNV Gn/Gc to the cell  
252 surface by disrupting its interaction with one or more unknown cellular factors that mediate  
253 Golgi retention. The rVSV system described here could be useful for further studies required to  
254 characterize this Golgi retention mechanism.

255           How the Gc (S1094L) mutation increases rVSV-HTNV Gn/Gc infectivity is less clear. It  
256 failed to enhance cell surface expression and VSV incorporation of Gn/Gc on its own (**Figs. 3-5**).  
257 S1094 is highly conserved across hantaviruses and is located in the membrane-proximal, C-  
258 terminal half of the Gc stem (**Fig. 7**). The Gc stem is critical for the formation of the postfusion  
259 hairpin conformation (66) and peptides corresponding to its C-terminal half inhibit ANDV  
260 infection and membrane fusion (67). Most of the Gc stem, including the S1094 residue was not  
261 visualized in the hantavirus Gc crystal structure (68, 69). Alteration in the physical curvature of  
262 the membrane by the membrane-proximal region of the VSV glycoprotein stem region has been  
263 proposed to enhance VSV budding efficiency (70). However, S1094L alone did not affect

264 budding efficiency (**Fig. 1E, 6A**). We speculate that this mutation might also alter intersubunit  
265 interactions and/or the glycoprotein fusogenicity.

266           Together, our results suggest that the enhancement of cell surface expression of other  
267 bunyaviral glycoprotein(s) through incorporation of cognate mutations should enhance the utility  
268 of existing single-cycle VSV vectors bearing Old-World hantavirus glycoproteins and facilitate  
269 the generation of rVSVs bearing these are other bunyaviral glycoproteins. Moreover, the  
270 enhancements in incorporation of Gn/Gc into pseudotyped virus particles and localization at the  
271 cell surface in infected cells might elicit a more immunogenic response and pave the way for  
272 novel VSV-based bunyaviral vaccines.

273

## Materials and Methods

274 **Cells.** Human osteosarcoma U2OS and embryonic kidney fibroblast 293T cells obtained from  
275 ATCC were cultured in modified McCoy's 5A media (Thermo Fisher) and high-glucose  
276 Dulbecco's modified Eagle medium (DMEM, Thermo Fisher) supplemented with 10% fetal  
277 bovine serum (FBS, Atlanta Biologicals), 1% GlutaMAX (Thermo Fisher), and 1% penicillin-  
278 streptomycin (Pen-Strep, Thermo Fisher), respectively. African green monkey kidney Vero cells  
279 (from ATCC) were cultured in DMEM supplemented with 2% FBS, 1% GlutaMAX, and 1% Pen  
280 Strep. Human umbilical vein endothelial cells (HUVEC, Lonza) were cultured in EGM media  
281 supplemented with EGM-SingleQuots (Lonza). All adherent cell lines were maintained in a  
282 humidified 37°C, 5% CO<sub>2</sub> incubator. Freestyle™-293-F suspension-adapted HEK-293 cells  
283 (Thermo Fisher) were maintained in GIBCO FreeStyle™ 293 expression medium (Thermo  
284 Fisher) using shaker flasks at 115 rpm, 37°C and 8% CO<sub>2</sub>.

285 **Plasmids.** Generation of the plasmid encoding human, codon optimized HTNV Gn/Gc (76-118  
286 strain, GenBank accession number NP\_941978.1) in the genome of vesicular stomatitis virus  
287 (VSV), carrying an eGFP gene, was described previously (36). HTNV Gn/Gc point mutations  
288 (I532K, S1094L, or I532K/S1094L) were cloned into the genomic VSV (described above) and  
289 pCAGGS plasmids using standard molecular biology techniques. Human, codon-optimized  
290 variable heavy (VH, GenBank accession number FJ751231) and light (VL, GenBank accession  
291 number FJ751232) chain sequences of HTNV Gc-specific mAb, 3G1 (37), were synthesized by  
292 Epoch Biosciences and cloned into the pMAZ heavy (IgH) and light (IgL) chain vectors (71),  
293 respectively. The sequences of all plasmid inserts were confirmed by Sanger sequencing.

294 **Generation of recombinant and pseudotyped VSVs.** Replication-competent, recombinant  
295 VSVs (rVSVs) bearing WT or Gn/Gc-mutant HTNV Gn/Gc were generated using a plasmid-

296 based rescue system in 293T cells as described previously (Kleinfelter et al., mBio, Whelan et  
297 al., 1995). When required, rescued viruses were propagated on Vero cells, and HTNV Gn/Gc  
298 sequences were amplified from viral genomic RNA by RT-PCR and analyzed by Sanger  
299 sequencing. Single-cycle VSVΔG pseudotypes, encoding an eGFP reporter, were produced in  
300 293T cells as described previously (Kleinfelter et al., mBio, Whelan et al., 1995). Viral infection  
301 was scored by manually enumerating eGFP-expressing cells using an Axio Observer inverted  
302 microscope (Zeiss), as described previously (36).

303 **Production of HTNV Gc-specific mAb 3G1.** mAb 3G1 was purified from the supernatants of  
304 Freestyle™-293-F suspension cells transiently co-transfected with pMAZ vectors expressing  
305 heavy and light chains of 3G1 as described previously (31).

306 **Detection of HTNV Gn/Gc surface expression by flow cytometry.** Human U2OS  
307 osteosarcoma cells, seeded in 6-well plates 18-22 h prior to transfection, were transfected with 2  
308 µg of the pCAGGS vectors, expressing nothing or variants of HTNV Gn/Gc, and 0.5 µg of a  
309 plasmid expressing eGFP. At 24 h post transfection, cell plates were chilled on ice for 10 min  
310 and blocked with chilled 10% Fetal Bovine Serum (FBS) in phosphate buffer saline (PBS) for 30  
311 min at 4°C. Surface HTNV Gc was stained using human anti-HTNV Gc mAb 3G1 (7.3 µg/mL)  
312 followed by anti-human AlexaFluor 555 (5 µg/mL, Thermo Fisher) for 1 h at 4°C each. After  
313 extensive washing, cells were stained with Live/Dead™ Fixable Violet Dead Cell Stain Kit  
314 (Invitrogen), washed again with PBS, and re-suspended in 2% FBS in PBS. Stained cells were  
315 passed through a 0.41 µm Nylon Net Filter (Millipore) and analyzed using a LSRII Flow  
316 Cytometer and FloJo V.10 software.

317



318 **Immunofluorescence microscopy for HTNV Gn/Gc localization.** Human U2OS osteosarcoma  
319 cells plated on fibronectin-coated glass coverslips were transfected with 500 ng of empty vector  
320 or HTNV Gn/Gc expression vectors together with 50 ng of eGFP expressing plasmid as  
321 described above. At 24 h post-transfection, cells were fixed with 4% formaldehyde (Sigma) for 5  
322 min and permeabilized with 0.1% Triton X-100 for 10 min at room temperature. After blocking,  
323 HTNV Gn and Gc were detected by incubating cells with an anti-HTNV Gn mouse mAb 3D5  
324 (BEI Resources, 1:500 dilution) followed by anti-mouse AlexaFluor-488 antibody, or an anti-  
325 HTNV Gc human mAb 3G1 (4.6 µg/mL) followed by anti-human AlexaFluor-555 antibody  
326 (Thermo Fisher), respectively. Anti-GM130 (1.25 µg/mL, BD Biosciences) was used to co-stain  
327 Golgi apparatus. For surface staining, cells were placed on ice 10 min prior to blocking for 30  
328 min at 4°C and incubated with the above-described HTNV Gn or Gc antibodies on ice before  
329 fixing and staining with the secondary antibodies as above. Primary human umbilical vein  
330 endothelial cells (HUVECs) were nucleofected with 4.75 µg of empty or HTNV Gn/Gc  
331 expressing vectors, together with 50 ng eGFP, using the Amaxa Kit (program A-034, Lonza)  
332 before staining for total Gn/Gc expression at 72 h post-nucleofection as described above for  
333 U2OS cells. Coverslips were mounted on slides with Prolong containing DAPI (Thermo Fisher)  
334 and were imaged using a Zeiss Axio Observer inverted microscope with 40x objective.

335 **In-cell ELISA for HTNV Gn/Gc expression.** 293T cells, transfected with empty vector or  
336 vectors expressing various HTNV Gn/Gc variants using Lipofectamine-3000 (Invitrogen), were  
337 fixed with 4% formaldehyde (Sigma) for 5 min, and permeabilized with 0.1% Triton X-100 for  
338 15 min at room temperature. After blocking with 5% FBS in PBS (1 h at room temperature),  
339 total HTNV Gn/Gc expression was detected by incubation with anti-HTNV Gc mAb-3G1 (0.7  
340 µg/mL, 1 h at room temperature) followed by anti-human HRP (Thermo Fisher, 0.045 µg/mL, 1

341 h at room temperature). ELISA signal was developed using 1-Step™ Ultra TMB-ELISA  
342 substrate solution (Thermo Scientific) and measured on a Perkin Elmer Wallac 1420 Victor2™  
343 microplate reader. For measuring cell surface expression of HTNV Gn/Gc, live cells, blocked  
344 with 5% FBS in PBS (1 h on ice), were incubated with anti-HTNV Gc mAb-3G1 (0.7 µg/mL, 1  
345 h on ice) before fixing and incubation with the second antibody. No permeabilization step was  
346 involved. Absorbance at 450 nm were corrected for background by subtracting the signal from  
347 cells transfected with an empty vector.

348 **ELISA for HTNV Gn/Gc incorporation in VSV particles.** To measure HTNV Gn/Gc  
349 incorporation into virus particles, we first normalized the ELISA input of single-cycle,  
350 pseudotyped vesicular stomatitis viruses (pVSVs) bearing HTNV Gn/Gc variants by  
351 immunoblotting (using mouse anti-VSV M mAb 23H12) for the VSV M content. Next, ELISA  
352 plates were coated with serial 2-fold dilutions of normalized pVSV particles bearing WT or  
353 Gn/Gc mutant HTNV glycoproteins overnight at 4°C. After blocking, HTNV Gc specific was  
354 detected using anti-HTNV Gc mAb 3G1 (732 ng/mL) followed by anti-human HRP antibody (44  
355 ng/mL, Thermo Fisher) by incubating for 1 h each at 37°C. ELISA was developed and  
356 absorbance at 450 nm was measured as described above.

357 **Hantavirus Gn/Gc sequence alignment** - Alignment of amino acid sequences of the N-terminal  
358 20 amino acids of the cytoplasmic tail of Gn and C-terminal 20 acids from 13 species of  
359 hantaviruses generated by Clustal Omega. The sequences used for the alignment, along with  
360 their GenBank accession numbers, were: Hantaan virus (HTNV) - [NP\\_941978.1](#); Seoul virus  
361 (SEOV) - [M34882.1](#); Dobrava-Belgrade virus (DOBV) - [NC\\_005234.1](#); Andes virus (ANDV) -  
362 [NP\\_604472.1](#); Choclo virus (CHOCV) - [KT983772.1](#); Maporal virus (MPRLV) - [NC\\_034552.1](#);  
363 Laguna Negra virus (LGNV) - [AF005728.1](#); New York-1 virus (NYV-1) - [U36802.1](#); Sin

364 Nombre virus (SNV) - [NP\\_941974.1](#); Bayou virus (BAYV) - [GQ244521.1](#); Black Creek Canal  
365 virus (BCCV) - [L39950.1](#); Puumala virus (PUUV) - [KT885051.1](#) and Prospect Hill virus (PHV)  
366 - [CAA38922.1](#). WebLogoes were generated as described earlier (72).

367

## Acknowledgements

368 We thank Tyler Krause, Cecelia Harold, and Tanwee Alkutkar for technical support and the  
369 Einstein Flow Cytometry Core (supported by NCI center grant P30CA013330). This work is  
370 supported by NIH grant AI101436 (to K.C.). K.C. was additionally supported by an Irma T.  
371 Hirschl/Monique Weill-Caulier Research Award. M.M.S. was additionally supported by NIH  
372 T32 training grant AI070117. The anti-Hantaan virus Gn-specific monoclonal antibody was  
373 obtained from the Joel M. Dalrymple – Clarence J. Peters USAMRIID Antibody Collection  
374 through BEI Resources, NIAID, NIH: Monoclonal Anti-Hantaan Virus Gn Glycoprotein, Clone  
375 3D5 (produced in vitro), NR-36162.

376

## References

- 377 1. **Jonsson CB, Figueiredo LTM, Vapalahti O.** 2010. A global perspective on hantavirus  
378 ecology, epidemiology, and disease. *Clin. Microbiol. Rev.* **23**:412–441.
- 379 2. **Clement J, Vercauteren J, Verstraeten WW, Ducoffre G, Barrios JM, Vandamme A-**  
380 **M, Maes P, Van Ranst M.** 2009. Relating increasing hantavirus incidences to the  
381 changing climate: the mast connection. *Int. J. Health Geogr.* **8**:1.
- 382 3. **Dearing MD, Dizney L.** 2010. Ecology of hantavirus in a changing world. *Ann. N. Y.*  
383 *Acad. Sci.* **1195**:99–112.
- 384 4. **Holmes EC, Zhang Y-Z.** 2015. The evolution and emergence of hantaviruses. *Curr. Opin.*  
385 *Virol.* **10**:27–33.
- 386 5. **Yanagihara R, Gu SH, Arai S, Kang HJ, Song J-W.** 2014. Hantaviruses: rediscovery  
387 and new beginnings. *Virus Res.* **187**:6–14.
- 388 6. **Wu X, Lu Y, Zhou S, Chen L, Xu B.** 2016. Impact of climate change on human  
389 infectious diseases: Empirical evidence and human adaptation. *Environ. Int.* **86**:14–23.
- 390 7. **Schmaljohn C.** 2009. Vaccines for hantaviruses. *Vaccine* **27 Suppl 4**:D61-4.
- 391 8. **Maes P, Clement J, Van Ranst M.** 2009. Recent approaches in hantavirus vaccine  
392 development. *Expert Rev. Vaccines* **8**:67–76.
- 393 9. **Jung J, Ko S-J, Oh HS, Moon SM, Song J-W, Huh K.** 2018. Protective effectiveness of  
394 inactivated hantavirus vaccine against hemorrhagic fever with renal syndrome. *J. Infect.*  
395 *Dis.*
- 396 10. **Schnell MJ, Buonocore L, Kretzschmar E, Johnson E, Rose JK.** 1996. Foreign  
397 glycoproteins expressed from recombinant vesicular stomatitis viruses are incorporated  
398 efficiently into virus particles. *Proc Natl Acad Sci USA* **93**:11359–11365.

- 399 11. **Soneoka Y, Cannon PM, Ramsdale EE, Griffiths JC, Romano G, Kingsman SM,**  
400 **Kingsman AJ.** 1995. A transient three-plasmid expression system for the production of  
401 high titer retroviral vectors. *Nucleic Acids Res.* **23**:628–633.
- 402 12. **Takada A, Robison C, Goto H, Sanchez A, Murti KG, Whitt MA, Kawaoka Y.** 1997.  
403 A system for functional analysis of Ebola virus glycoprotein. *Proc Natl Acad Sci USA*  
404 **94**:14764–14769.
- 405 13. **Larson RA, Dai D, Hosack VT, Tan Y, Bolken TC, Hrubby DE, Amberg SM.** 2008.  
406 Identification of a broad-spectrum arenavirus entry inhibitor. *J. Virol.* **82**:10768–10775.
- 407 14. **Garbutt M, Liebscher R, Wahl-Jensen V, Jones S, Möller P, Wagner R, Volchkov V,**  
408 **Klenk H-D, Feldmann H, Ströher U.** 2004. Properties of replication-competent vesicular  
409 stomatitis virus vectors expressing glycoproteins of filoviruses and arenaviruses. *J. Virol.*  
410 **78**:5458–5465.
- 411 15. **Regules JA, Beigel JH, Paolino KM, Voell J, Castellano AR, Hu Z, Muñoz P, Moon**  
412 **JE, Ruck RC, Bennett JW, Twomey PS, Gutiérrez RL, Remich SA, Hack HR,**  
413 **Wisniewski ML, Josleyn MD, Kwilas SA, Van Deusen N, Mbaya OT, Zhou Y,**  
414 **rVSVΔG-ZEBOV-GP Study Group.** 2017. A recombinant vesicular stomatitis virus  
415 ebola vaccine. *N. Engl. J. Med.* **376**:330–341.
- 416 16. **Ogino M, Ebihara H, Lee BH, Araki K, Lundkvist A, Kawaoka Y, Yoshimatsu K,**  
417 **Arikawa J.** 2003. Use of vesicular stomatitis virus pseudotypes bearing hantaan or seoul  
418 virus envelope proteins in a rapid and safe neutralization test. *Clinical and Vaccine*  
419 *Immunology* **10**:154–160.
- 420 17. **Betenbaugh M, Yu M, Kuehl K, White J, Pennock D, Spik K, Schmaljohn C.** 1995.  
421 Nucleocapsid- and virus-like particles assemble in cells infected with recombinant

- 422 baculoviruses or vaccinia viruses expressing the M and the S segments of Hantaan virus.  
423 Virus Res. **38**:111–124.
- 424 18. **Li C, Liu F, Liang M, Zhang Q, Wang X, Wang T, Li J, Li D.** 2010. Hantavirus-like  
425 particles generated in CHO cells induce specific immune responses in C57BL/6 mice.  
426 Vaccine **28**:4294–4300.
- 427 19. **Acuña R, Cifuentes-Muñoz N, Márquez CL, Bulling M, Klingström J, Mancini R,**  
428 **Lozach P-Y, Tischler ND.** 2014. Hantavirus Gn and Gc glycoproteins self-assemble into  
429 virus-like particles. J. Virol. **88**:2344–2348.
- 430 20. **Ma M, Kersten DB, Kamrud KI, Wool-Lewis RJ, Schmaljohn C, González-Scarano**  
431 **F.** 1999. Murine leukemia virus pseudotypes of La Crosse and Hantaan Bunyaviruses: a  
432 system for analysis of cell tropism. Virus Res. **64**:23–32.
- 433 21. **Cifuentes-Muñoz N, Darlix J-L, Tischler ND.** 2010. Development of a lentiviral vector  
434 system to study the role of the Andes virus glycoproteins. Virus Res. **153**:29–35.
- 435 22. **Cifuentes-Muñoz N, Barriga GP, Valenzuela PDT, Tischler ND.** 2011. Aromatic and  
436 polar residues spanning the candidate fusion peptide of the Andes virus Gc protein are  
437 essential for membrane fusion and infection. J. Gen. Virol. **92**:552–563.
- 438 23. **Yu L, Bai W, Wu X, Zhang L, Zhang L, Li P, Wang F, Liu Z, Zhang F, Xu Z.** 2013. A  
439 recombinant pseudotyped lentivirus expressing the envelope glycoprotein of hantaan virus  
440 induced protective immunity in mice. Virol. J. **10**:301.
- 441 24. **Qian Z, Haessler M, Lemos JA, Arsenault JR, Aguirre JE, Gilbert JR, Bowler RP,**  
442 **Park F.** 2006. Targeting vascular injury using Hantavirus-pseudotyped lentiviral vectors.  
443 Mol. Ther. **13**:694–704.
- 444 25. **Lee B-H, Yoshimatsu K, Araki K, Okumura M, Nakamura I, Arikawa J.** 2006. A

- 445 pseudotype vesicular stomatitis virus containing Hantaan virus envelope glycoproteins G1  
446 and G2 as an alternative to hantavirus vaccine in mice. *Vaccine* **24**:2928–2934.
- 447 26. **Higa MM, Petersen J, Hooper J, Doms RW**. 2012. Efficient production of Hantaan and  
448 Puumala pseudovirions for viral tropism and neutralization studies. *Virology* **423**:134–142.
- 449 27. **Petersen J, Drake MJ, Bruce EA, Riblett AM, Didigu CA, Wilen CB, Malani N, Male  
450 F, Lee F-H, Bushman FD, Cherry S, Doms RW, Bates P, Briley K**. 2014. The major  
451 cellular sterol regulatory pathway is required for Andes virus infection. *PLoS Pathog.*  
452 **10**:e1003911.
- 453 28. **Paneth Iheozor-Ejiofor R, Levanov L, Hepojoki J, Strandin T, Lundkvist Å, Plyusnin  
454 A, Vapalahti O**. 2016. Vaccinia virus-free rescue of fluorescent replication-defective  
455 vesicular stomatitis virus and pseudotyping with Puumala virus glycoproteins for use in  
456 neutralization tests. *J. Gen. Virol.* **97**:1052–1059.
- 457 29. **Ray N, Whidby J, Stewart S, Hooper JW, Bertolotti-Ciarlet A**. 2010. Study of Andes  
458 virus entry and neutralization using a pseudovirion system. *J. Virol. Methods* **163**:416–  
459 423.
- 460 30. **Wong AC, Sandesara RG, Mulherkar N, Whelan SP, Chandran K**. 2010. A forward  
461 genetic strategy reveals destabilizing mutations in the Ebolavirus glycoprotein that alter its  
462 protease dependence during cell entry. *J. Virol.* **84**:163–175.
- 463 31. **Wec AZ, Herbert AS, Murin CD, Nyakatura EK, Abelson DM, Fels JM, He S, James  
464 RM, de La Vega M-A, Zhu W, Bakken RR, Goodwin E, Turner HL, Jangra RK,  
465 Zeitlin L, Qiu X, Lai JR, Walker LM, Ward AB, Dye JM, Bornholdt ZA**. 2017.  
466 Antibodies from a Human Survivor Define Sites of Vulnerability for Broad Protection  
467 against Ebolaviruses. *Cell* **169**:878–890.e15.



- 468 32. **Kajihara M, Nakayama E, Marzi A, Igarashi M, Feldmann H, Takada A.** 2013. Novel  
469 mutations in Marburg virus glycoprotein associated with viral evasion from antibody  
470 mediated immune pressure. *J. Gen. Virol.* **94**:876–883.
- 471 33. **Furuyama W, Marzi A, Nanbo A, Haddock E, Maruyama J, Miyamoto H, Igarashi**  
472 **M, Yoshida R, Noyori O, Feldmann H, Takada A.** 2016. Discovery of an antibody for  
473 pan-ebolavirus therapy. *Sci. Rep.* **6**:20514.
- 474 34. **Brown KS, Safronetz D, Marzi A, Ebihara H, Feldmann H.** 2011. Vesicular stomatitis  
475 virus-based vaccine protects hamsters against lethal challenge with Andes virus. *J. Virol.*  
476 **85**:12781–12791.
- 477 35. **Prescott J, DeBuysscher BL, Brown KS, Feldmann H.** 2014. Long-term single-dose  
478 efficacy of a vesicular stomatitis virus-based Andes virus vaccine in Syrian hamsters.  
479 *Viruses* **6**:516–523.
- 480 36. **Kleinfelter LM, Jangra RK, Jae LT, Herbert AS, Mittler E, Stiles KM, Wirchnianski**  
481 **AS, Kielian M, Brummelkamp TR, Dye JM, Chandran K.** 2015. Haploid genetic  
482 screen reveals a profound and direct dependence on cholesterol for hantavirus membrane  
483 fusion. *MBio* **6**:e00801.
- 484 37. **Yang J, Chen R, Wei J, Zhang F, Zhang Y, Jia L, Yan Y, Luo W, Cao Y, Yao L, Sun**  
485 **J, Xu Z, Yang A.** 2010. Production and characterization of a recombinant single-chain  
486 antibody against Hantaan virus envelop glycoprotein. *Appl. Microbiol. Biotechnol.*  
487 **86**:1067–1075.
- 488 38. **Brown EL, Lyles DS.** 2003. Organization of the vesicular stomatitis virus glycoprotein  
489 into membrane microdomains occurs independently of intracellular viral components. *J.*  
490 *Virol.* **77**:3985–3992.

- 491 39. **Ruusala A, Persson R, Schmaljohn CS, Pettersson RF.** 1992. Coexpression of the  
492 membrane glycoproteins G1 and G2 of Hantaan virus is required for targeting to the Golgi  
493 complex. *Virology* **186**:53–64.
- 494 40. **Pensiero MN, Hay J.** 1992. The Hantaan virus M-segment glycoproteins G1 and G2 can  
495 be expressed independently. *J. Virol.* **66**:1907–1914.
- 496 41. **Chandran K, Sullivan NJ, Felbor U, Whelan SP, Cunningham JM.** 2005. Endosomal  
497 proteolysis of the Ebola virus glycoprotein is necessary for infection. *Science* **308**:1643–  
498 1645.
- 499 42. **Carette JE, Raaben M, Wong AC, Herbert AS, Obernosterer G, Mulherkar N,**  
500 **Kuehne AI, Kranzusch PJ, Griffin AM, Ruthel G, Dal Cin P, Dye JM, Whelan SP,**  
501 **Chandran K, Brummelkamp TR.** 2011. Ebola virus entry requires the cholesterol  
502 transporter Niemann-Pick C1. *Nature* **477**:340–343.
- 503 43. **Jae LT, Raaben M, Herbert AS, Kuehne AI, Wirchnianski AS, Soh TK, Stubbs SH,**  
504 **Janssen H, Damme M, Saftig P, Whelan SP, Dye JM, Brummelkamp TR.** 2014. Virus  
505 entry. Lassa virus entry requires a trigger-induced receptor switch. *Science* **344**:1506–  
506 1510.
- 507 44. **Marzi A, Engelmann F, Feldmann F, Haberthur K, Shupert WL, Brining D, Scott**  
508 **DP, Geisbert TW, Kawaoka Y, Katze MG, Feldmann H, Messaoudi I.** 2013.  
509 Antibodies are necessary for rVSV/ZEBOV-GP-mediated protection against lethal Ebola  
510 virus challenge in nonhuman primates. *Proc Natl Acad Sci USA* **110**:1893–1898.
- 511 45. **Wec AZ, Nyakatura EK, Herbert AS, Howell KA, Holtsberg FW, Bakken RR,**  
512 **Mittler E, Christin JR, Shulenin S, Jangra RK, Bharrhan S, Kuehne AI, Bornholdt**  
513 **ZA, Flyak AI, Saphire EO, Crowe JE, Aman MJ, Dye JM, Lai JR, Chandran K.**

- 514 2016. A “Trojan horse” bispecific-antibody strategy for broad protection against  
515 ebolaviruses. *Science* **354**:350–354.
- 516 46. **Hung T**. 1988. Atlas of Hemorrhagic Fever with Renal Syndrome. Beijing: Science Press.
- 517 47. **Hung T, Xia SM, Zhao TX, Zhou JY, Song G, Liao GXH, Ye WW, Chu YL, Hang**  
518 **CS**. 1983. Morphological evidence for identifying the viruses of hemorrhagic fever with  
519 renal syndrome as candidate members of the bunyaviridae family. *Arch. Virol.* **78**:137–  
520 144.
- 521 48. **Shi X, Elliott RM**. 2002. Golgi localization of Hantaan virus glycoproteins requires  
522 coexpression of G1 and G2. *Virology* **300**:31–38.
- 523 49. **Ogino M, Yoshimatsu K, Ebihara H, Araki K, Lee B-H, Okumura M, Arikawa J**.  
524 2004. Cell fusion activities of Hantaan virus envelope glycoproteins. *J. Virol.* **78**:10776–  
525 10782.
- 526 50. **Pettersson RF, Melin L**. 1996. Synthesis, assembly, and intracellular transport of  
527 bunyaviridae membrane proteins, p. 159–188. *In* Elliott, RM (ed.), *The Bunyaviridae*.  
528 Springer US, Boston, MA.
- 529 51. **Shi X, Kohl A, Li P, Elliott RM**. 2007. Role of the cytoplasmic tail domains of  
530 Bunyamwera orthobunyavirus glycoproteins Gn and Gc in virus assembly and  
531 morphogenesis. *J. Virol.* **81**:10151–10160.
- 532 52. **Overby AK, Popov VL, Pettersson RF, Neve EPA**. 2007. The cytoplasmic tails of  
533 Uukuniemi Virus (Bunyaviridae) G(N) and G(C) glycoproteins are important for  
534 intracellular targeting and the budding of virus-like particles. *J. Virol.* **81**:11381–11391.
- 535 53. **Spiropoulou CF, Goldsmith CS, Shoemaker TR, Peters CJ, Compans RW**. 2003. Sin  
536 Nombre virus glycoprotein trafficking. *Virology* **308**:48–63.

- 537 54. **Spiropoulou CF**. 2001. Hantavirus maturation. *Curr. Top. Microbiol. Immunol.* **256**:33–  
538 46.
- 539 55. **Ravkov EV, Nichol ST, Compans RW**. 1997. Polarized entry and release in epithelial  
540 cells of Black Creek Canal virus, a New World hantavirus. *J. Virol.* **71**:1147–1154.
- 541 56. **Goldsmith CS, Elliott LH, Peters CJ, Zaki SR**. 1995. Ultrastructural characteristics of  
542 Sin Nombre virus, causative agent of hantavirus pulmonary syndrome. *Arch. Virol.*  
543 **140**:2107–2122.
- 544 57. **Deyde VM, Rizvanov AA, Chase J, Otteson EW, St Jeor SC**. 2005. Interactions and  
545 trafficking of Andes and Sin Nombre Hantavirus glycoproteins G1 and G2. *Virology*  
546 **331**:307–315.
- 547 58. **Hepojoki J, Strandin T, Wang H, Vapalahti O, Vaheri A, Lankinen H**. 2010.  
548 Cytoplasmic tails of hantavirus glycoproteins interact with the nucleocapsid protein. *J.*  
549 *Gen. Virol.* **91**:2341–2350.
- 550 59. **Strandin T, Hepojoki J, Wang H, Vaheri A, Lankinen H**. 2011. The cytoplasmic tail of  
551 hantavirus Gn glycoprotein interacts with RNA. *Virology* **418**:12–20.
- 552 60. **Andersson AM, Melin L, Bean A, Pettersson RF**. 1997. A retention signal necessary and  
553 sufficient for Golgi localization maps to the cytoplasmic tail of a Bunyaviridae  
554 (Uukuniemi virus) membrane glycoprotein. *J. Virol.* **71**:4717–4727.
- 555 61. **Andersson AM, Pettersson RF**. 1998. Targeting of a short peptide derived from the  
556 cytoplasmic tail of the G1 membrane glycoprotein of Uukuniemi virus (Bunyaviridae) to  
557 the Golgi complex. *J. Virol.* **72**:9585–9596.
- 558 62. **Gerrard SR, Li L, Barrett AD, Nichol ST**. 2004. Ngari virus is a Bunyamwera virus  
559 reassortant that can be associated with large outbreaks of hemorrhagic fever in Africa. *J.*

- 560 Virol. **78**:8922–8926.
- 561 63. **Matsuoka Y, Chen SY, Compans RW**. 1994. A signal for Golgi retention in the  
562 bunyavirus G1 glycoprotein. *J. Biol. Chem.* **269**:22565–22573.
- 563 64. **Matsuoka Y, Chen SY, Holland CE, Compans RW**. 1996. Molecular determinants of  
564 Golgi retention in the Punta Toro virus G1 protein. *Arch. Biochem. Biophys.* **336**:184–  
565 189.
- 566 65. **Shi X, Lappin DF, Elliott RM**. 2004. Mapping the Golgi targeting and retention signal of  
567 Bunyamwera virus glycoproteins. *J. Virol.* **78**:10793–10802.
- 568 66. **Guardado-Calvo P, Rey FA**. 2017. The envelope proteins of the bunyavirales. *Adv.*  
569 *Virus Res.* **98**:83–118.
- 570 67. **Barriga GP, Villalón-Letelier F, Márquez CL, Bignon EA, Acuña R, Ross BH,**  
571 **Monasterio O, Mardones GA, Vidal SE, Tischler ND**. 2016. Inhibition of the  
572 Hantavirus Fusion Process by Predicted Domain III and Stem Peptides from Glycoprotein  
573 Gc. *PLoS Negl. Trop. Dis.* **10**:e0004799.
- 574 68. **Guardado-Calvo P, Bignon EA, Stettner E, Jeffers SA, Pérez-Vargas J, Pehau-**  
575 **Arnaudet G, Tortorici MA, Jestin J-L, England P, Tischler ND, Rey FA**. 2016.  
576 Mechanistic Insight into Bunyavirus-Induced Membrane Fusion from Structure-Function  
577 Analyses of the Hantavirus Envelope Glycoprotein Gc. *PLoS Pathog.* **12**:e1005813.
- 578 69. **Willensky S, Bar-Rogovsky H, Bignon EA, Tischler ND, Modis Y, Dessau M**. 2016.  
579 Crystal Structure of Glycoprotein C from a Hantavirus in the Post-fusion Conformation.  
580 *PLoS Pathog.* **12**:e1005948.
- 581 70. **Robison CS, Whitt MA**. 2000. The membrane-proximal stem region of vesicular  
582 stomatitis virus G protein confers efficient virus assembly. *J. Virol.* **74**:2239–2246.

- 583 71. **Mazor Y, Barnea I, Keydar I, Benhar I.** 2007. Antibody internalization studied using a  
584 novel IgG binding toxin fusion. *J. Immunol. Methods* **321**:41–59.
- 585 72. **Crooks GE, Hon G, Chandonia JM, Brenner SE.** 2004. WebLogo: a sequence logo  
586 generator. *Genome Res.* **14**:1188–1190.

587

## Figure legends

588 **Fig. 1. Two point mutations (I532K & S1094L) in the Gn/Gc enhance rVSV-HTNV Gn/Gc**

589 **spread and replication.** (A) Schematic representation of the HTNV Gn/Gc. Location of the

590 point mutations acquired after serial passaging of rVSV expressing HTNV Gn/Gc. (B–C)

591 Growth of WT or mutant rVSV-HTNV Gn/Gc. Supernatants from 293FT cells co-transfected

592 with plasmids encoding rVSV genomes expressing eGFP bearing WT, I532K, S1094L or

593 I532K/S1094L versions of HTNV Gn/Gc with helper plasmids, were used to infect Vero cells.

594 (B) Representative images of eGFP expression in Vero cells at indicated times post infection. (C)

595 Supernatants collected from infected Vero cells at indicated times post-infection were titred on

596 naive Vero cells. Data from two independent experiments ( $n = 4$ ) are represented as log

597 infectious units (IU) per mL (mean  $\pm$  SD). “>” indicate virus titers that were below the limit of

598 detection (50 IU per mL). Groups were compared by two-way ANOVA with Tukey’s correction

599 for multiple comparisons. ns (not significant),  $P > 0.05$ ; \*\*\*\*,  $P < 0.0001$ . (D) Production of

600 single VSV pseudotypes (pVSV). 293T cells expressing WT, I532K, S1094L or I532K/S1094L

601 forms of HTNV Gn/Gc *in trans*, were infected with VSV-eGFP- $\Delta$ G (VSV expressing eGFP and

602 carrying VSV G glycoprotein on its surface, but lacking the G gene) 48 h later. Following

603 extensive washing to remove VSV G-carrying residual viruses, supernatants were collected at 48

604 h post-infection and infectious titers were measured on Vero cells. Mean  $\pm$  SEM from 4

605 independent experiments ( $n = 8$ ) are shown here. Background VSV pseudotype production from

606 empty vector-transfected cells was below the limit of detection (100 IU per mL). Groups were

607 compared by one-way ANOVA with Tukey’s correction for multiple comparisons. ns,  $P > 0.05$ ;

608 \*\*,  $P < 0.01$ ; \*\*\*,  $P < 0.001$ ; \*\*\*\*,  $P < 0.0001$ .

609 (E) HTNV Gn/Gc mutations do not affect overall VSV particle production. Equivalent amounts  
610 (by volume) of pelleted VSV pseudotypes from panel D were analyzed by VSV M-specific  
611 immunoblotting. A representative blot from 3 independent experiments is shown.

612

613 **Fig. 2. The HTNV Gn/Gc double mutations modestly enhances Gc production.** 293T cells,  
614 transfected with plasmids expressing empty vector or wild type, I532K, S1094L, or  
615 I532K/S1094L forms of HTNV Gn/Gc, were fixed at 48 h post-transfection. Following  
616 permeabilization, cells were tested for HTNV total Gc expression using an in-cell ELISA. To  
617 ensure linearity of the ELISA, serial 2-fold dilutions of the transfected cells were made by  
618 mixing them with untransfected cells. Data were graphed after background ELISA signal from  
619 empty vector-transfected 293T cells was subtracted. Data from 3 independent experiments ( $n =$   
620 5–6) are shown as mean  $\pm$  SEM. Groups were compared by one-way ANOVA with Tukey's  
621 correction for multiple comparisons. ns,  $P > 0.05$ .

622

623 **Fig. 3. The HTNV Gn/Gc mutations do not alter glycoprotein co-localization.** Human  
624 osteosarcoma U2OS cells, transfected with plasmids expressing wild type, I532K, S1094L, or  
625 I532K/S1094L variants of HTNV Gn/Gc, were fixed at 24 h post-transfection, permeabilized and  
626 co-immunostained with HTNV Gn- and Gc-specific antibodies (see Materials and Methods for  
627 details). EV, empty vector. Representative images for each of the HTNV variants from an  
628 experiment representative of at least 3 experiments are shown. Scale bar, 20  $\mu$ m.

629

630 **Fig. 4. Trafficking of HTNV Gn/Gc to the Golgi apparatus is unaffected by I532K &**  
631 **S1094L mutations.** (A) Human osteosarcoma U2OS cells, transfected with plasmids expressing



632 wild type, I532K, S1094L, or I532K/S1094L forms of HTNV Gn/Gc, were fixed at 24 h post-  
633 transfection, permeabilized, and co-stained with HTNV Gc specific (3G1) and Golgi apparatus-  
634 specific (GM130) antibodies. EV, empty vector. Representative images from an experiment, out  
635 of at least 3 independent experiments, are shown. Scale bar, 20  $\mu$ m.

636

637 **Fig. 5. The HTNV Gn/Gc I532K & S1094L mutations together enhance plasma membrane**  
638 **localization of Gn/Gc.** (A) U2OS cells, co-transfected with plasmids expressing eGFP and wild  
639 type, I532K, S1094L or I532K/S1094L forms of HTNV Gn/Gc, were stained for cell surface  
640 expression of HTNV Gn or Gc at 48 h post-transfection. (B) Primary human endothelial cells  
641 (HUVECs), nucleofected with plasmids encoding eGFP and wild type, I532K, S1094L, or  
642 I532K/S1094L versions of HTNV Gn/Gc, were fixed 72 h later, permeabilized, and stained with  
643 HTNV Gc-specific antibody. Representative images from a single experiment, illustrating at  
644 least 3 independent experiments, are shown for each panel A and B. EV, empty vector. Scale  
645 bars, 20  $\mu$ m. (C) U2OS cells, transfected as described in panel A, were immunostained for cell  
646 surface expression of HTNV Gc and analyzed using flow cytometry. Data from 3 independent  
647 experiments are shown as mean  $\pm$  SD. Groups were compared by one-way ANOVA with  
648 Tukey's correction for multiple comparisons. ns,  $P > 0.05$ ; \*,  $P < 0.05$ ; \*\*\*\*,  $P < 0.0001$ . (D)  
649 293T cells, transfected with plasmids expressing variants of HTNV Gn/Gc, were stained, at 48 h  
650 post-transfection, for cell surface expression of HTNV Gc, and detected by on-cell ELISA using  
651 Gc-specific mAb 3G1 (Mean  $\pm$  SEM, n = 5–6 from 3 independent experiments). Groups were  
652 compared by two-way ANOVA with Tukey's correction for multiple comparisons. ns,  $P > 0.05$ ;  
653 \*\*\*\*,  $P < 0.0001$ .

654

655 **Fig. 6. I532K & S1094L mutations collectively increased HTNV Gn/Gc incorporation into**  
656 **VSV virions.** (A) Normalization of virus particles carrying HTNV Gn/Gc variants by  
657 immunoblotting of VSV matrix (M) protein. Numbers below the blot indicate relative amount of  
658 VSV M protein detected as compared to the WT. Representative blot of at least 3 independent  
659 experiments is shown here. (B) Serial 2-fold dilutions of normalized pVSV particles as  
660 ascertained in panel A, were captured on an ELISA plate and subjected to an HTNV Gc-specific  
661 ELISA (Mean  $\pm$  SEM,  $n = 8$  from 4 independent assays performed on two independent virus  
662 preparations). Groups were compared by two-way ANOVA with Tukey's correction for multiple  
663 comparisons. ns,  $P > 0.05$ ; \*\*\*\*,  $P < 0.0001$ .

664

665 **Fig. 7. Alignment of Gn/Gc sequences flanking the mutation sites from various**  
666 **hantaviruses.** Schematic of cytoplasmic tail of n and stem region of Gc is shown in the top  
667 panel. Alignment of amino acid sequences of the N-terminal 20 amino acids of the cytoplasmic  
668 tail of Gn and C-terminal 20 acids from 13 species of hantaviruses generated by Clustal Omega  
669 along with a WebLogo version (bottom panel) is shown. Abbreviations: Hantaan virus (HTNV),  
670 Seoul virus (SEOV), Dobrava-Belgrade virus (DOBV), Andes virus (ANDV), Choclo virus  
671 (CHOCV), Maporal virus (MPRLV), Laguna Negra virus (LGNV), New York-1 virus (NYV-1),  
672 Sin Nombre virus (SNV), Bayou virus (BAYV), Black Creek Canal virus (BCCV), Puumala  
673 virus (PUUV) and Prospect Hill virus (PHV).

**Fig. 1**

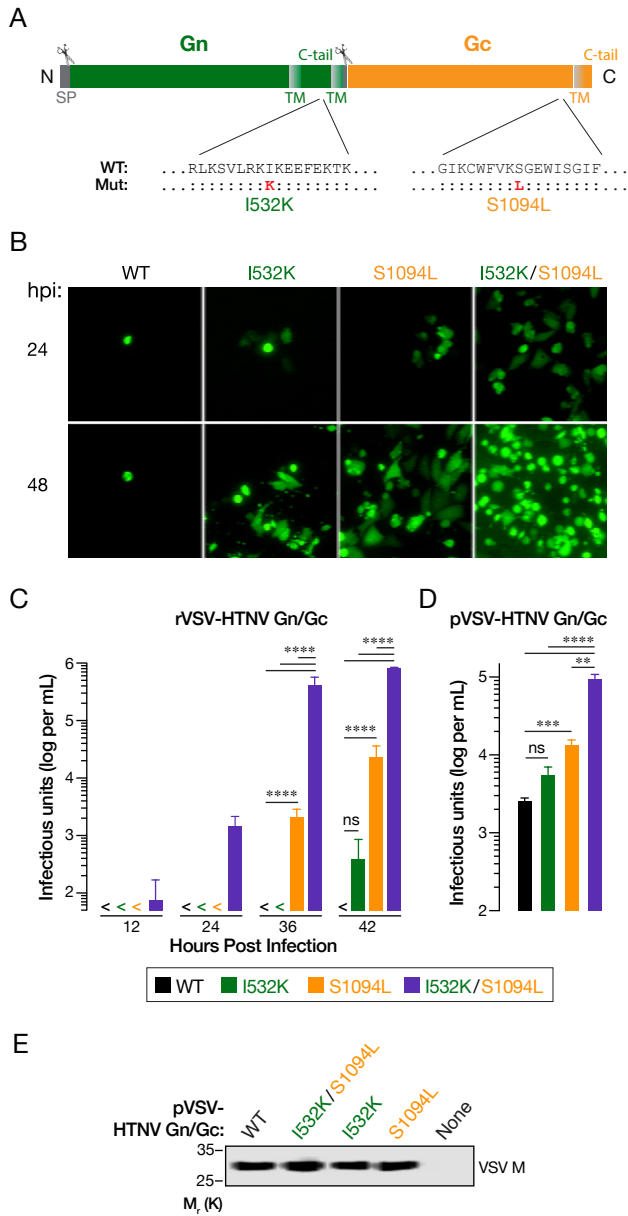

**Fig. 2**

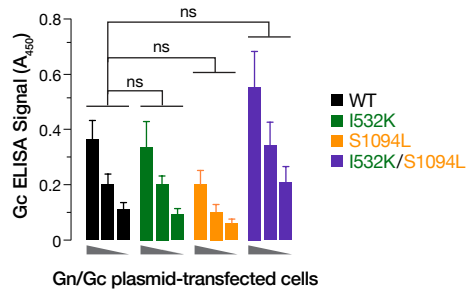

**Fig. 3**

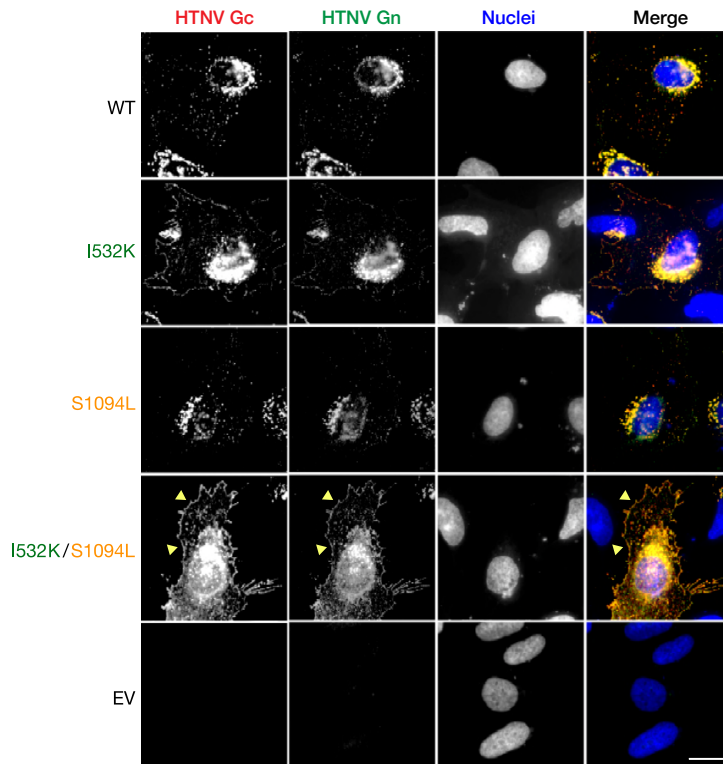

**Fig. 4**

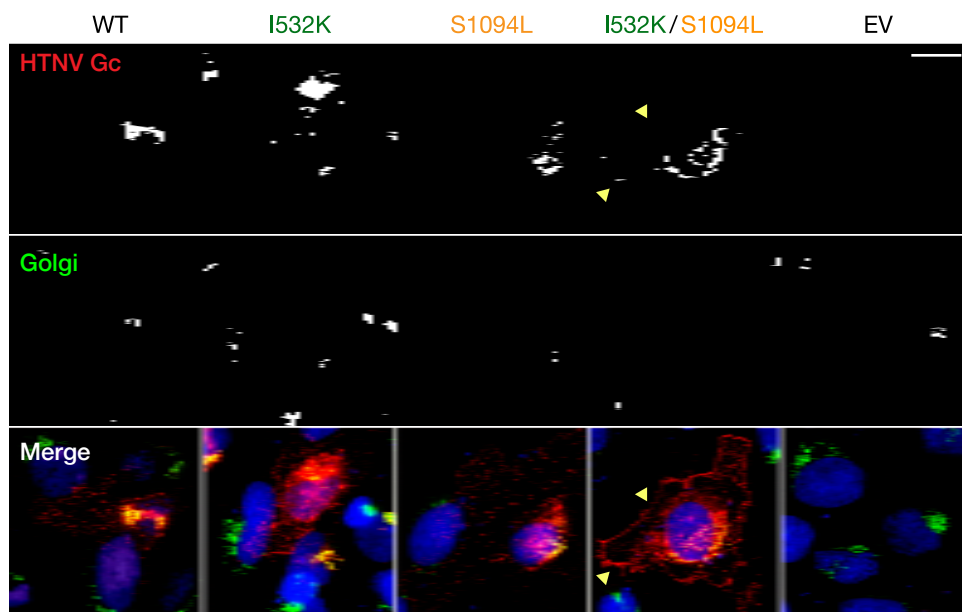

**Fig. 5**

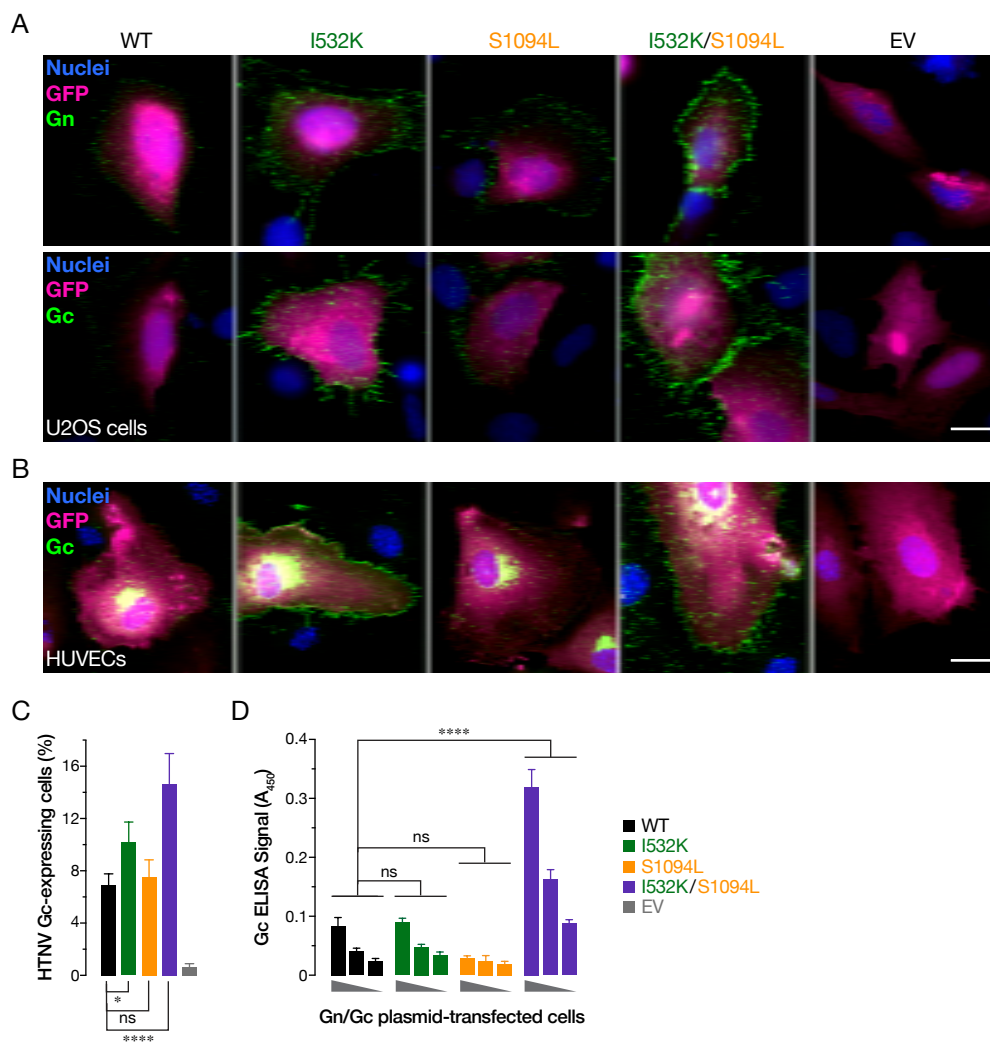

**Fig. 6**

**A**

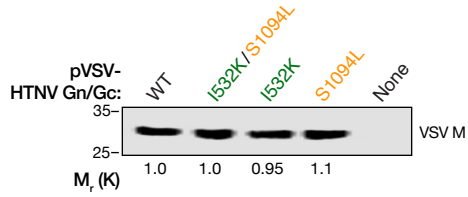

**B**

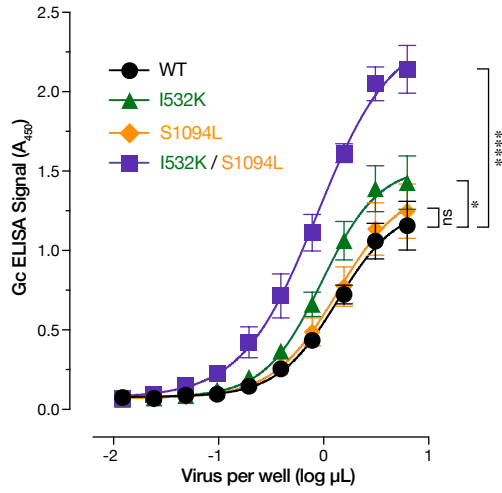



Fig. 7

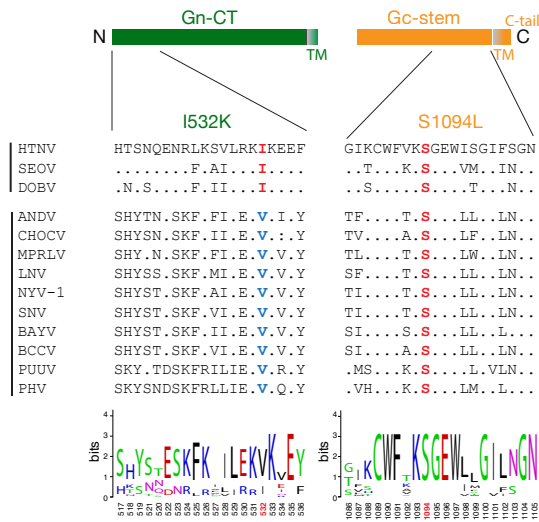

Source: https://www.biorxiv.org/content/10.1101/356055v1.full.pdf
